# Supplementary material
Source: publisher figshare collection journal article supplement (https://frontiersin.figshare.com/ndownloader/files/22026840)

**Supplementary Material 1** Schematic diagram showing basal and dispersed populations of DGCs in the dentate gyrus of MTLE cases with no, moderate or severe (bilaminated) GCD. In this study, the thickness of the GCL was measured in over 19 evenly-spaced points along the GCL. Lines were drawn from basal granule cell layer bordering the CA4 region to furthest dispersed cells, perpendicular to the length of GCL. The distance of 215  $\mu\text{m}$  from basal granule cell layer was arbitrary and was used to denote a midpoint within the molecular cell layer to indicate the inner and outer molecular layers. *Abbreviations:* GCD granule cell dispersion, GCL granule cell layer, MOL molecular layer.

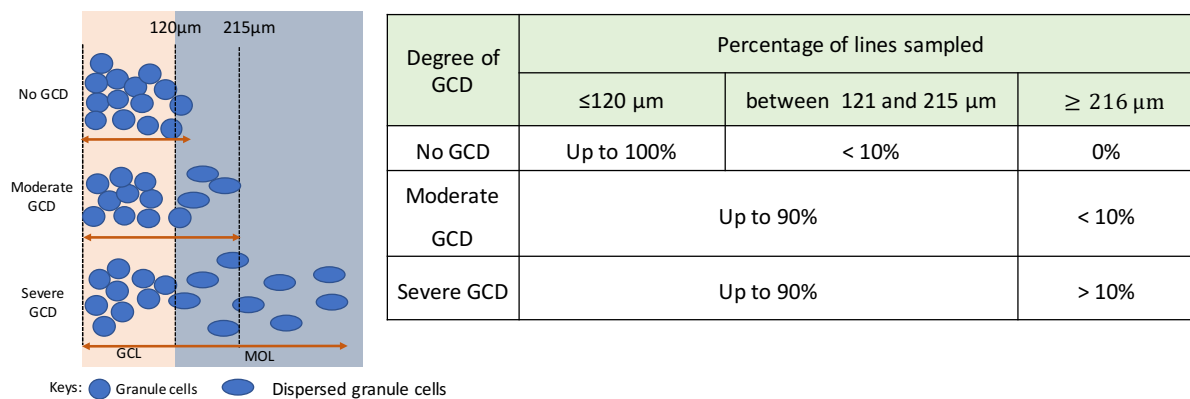

Supplement: Supplementary file [file 22026840]
